# Supplementary material
Source: PubMed Central journal article supplement (PMC7677169)
Supplement: NIHMS1619744-supplement-1.pdf [file NIHMS1619744-supplement-1.pdf]

## Supplementary Information for:

### Single cell mutation analysis of clonal evolution in myeloid malignancies

**Authors:** Linde A. Miles<sup>1\*</sup>; Robert L. Bowman<sup>1\*</sup>; Tiffany R. Merlinsky<sup>1</sup>; Isabelle S. Csete<sup>1</sup>; Aik T. Ooi<sup>2</sup>, Robert Durruthy-Durruthy<sup>2</sup>, Michael Bowman<sup>3</sup>, Christopher Famulare<sup>4</sup>; Minal A. Patel<sup>4</sup>, Pedro Mendez<sup>2</sup>, Chrysanthi Ainali<sup>2</sup>, Benjamin Demaree<sup>5,6</sup>, Cyrille L. Delley<sup>5</sup>, Adam R. Abate<sup>5,6,7</sup>, Manimozhi Manivannan<sup>2</sup>, Sombeet Sahu<sup>2</sup>, Aaron D. Goldberg<sup>4,8</sup>, Kelly L. Bolton<sup>4,8</sup>, Ahmet Zehir<sup>9</sup>, Raajit Rampal<sup>4,8</sup>, Martin P. Carroll<sup>10</sup>; Sara E. Meyer<sup>11</sup>; Aaron D. Viny<sup>1,4,8</sup>; Ross L. Levine<sup>1,4,8\*</sup>

#### Affiliations:

<sup>1</sup>Human Oncology & Pathogenesis Program, Memorial Sloan Kettering Cancer Center, New York, USA;

<sup>2</sup> Mission Bio, South San Francisco, USA;

<sup>3</sup> Department of Mechanical Engineering, Colorado School of Mines, Golden, CO, USA;

<sup>4</sup> Center for Hematologic Malignancies, Memorial Sloan Kettering Cancer Center, New York, USA

<sup>5</sup>Department of Bioengineering and Therapeutic Sciences, University of California, San Francisco USA;

<sup>6</sup>UC-Berkeley-UCSF Graduate Program in Bioengineering, University of California, San Francisco USA;

<sup>7</sup>Chan Zuckerberg Biohub, San Francisco USA;

<sup>8</sup>Department of Medicine, Memorial Sloan Kettering Cancer Center, New York USA;

<sup>9</sup>Department of Pathology, Memorial Sloan Kettering Cancer Center, New York, USA;

## **Table of Contents**

**1) Supplementary Table 1. Amplicon Coverage for Custom Mission Bio single cell DNA sequencing panel.** Each amplicon is listed with genomic location (hg19) and gene name.

**2) Supplementary Table 2. Sample characteristics from clinical cohort.** Patient information from date of sample collection and sample characteristics for each sample are denoted.

**3) Supplementary Discussion**
