# Supplementary material
Source: PubMed Central journal article supplement (PMC7677169)
Supplement: NIHMS1619744-supplement-2.pdf [file NIHMS1619744-supplement-2.pdf]

**Supplementary Table 1. Amplicon Coverage for Custom Mission Bio single cell DNA sequencing panel.** Each amplicon is listed with genomic location (hg19) and gene name.

| <b>Chromosome</b> | <b>Start Location</b> | <b>End Location</b> | <b>Gene</b>   |
|-------------------|-----------------------|---------------------|---------------|
| chr1              | 43814923              | 43815097            | <i>MPL</i>    |
| chr1              | 115256350             | 115256544           | <i>NRAS</i>   |
| chr1              | 115258559             | 115258771           | <i>NRAS</i>   |
| chr2              | 25457136              | 25457350            | <i>DNMT3A</i> |
| chr2              | 25463120              | 25463328            | <i>DNMT3A</i> |
| chr2              | 25463448              | 25463646            | <i>DNMT3A</i> |
| chr2              | 25464333              | 25464542            | <i>DNMT3A</i> |
| chr2              | 25466647              | 25466857            | <i>DNMT3A</i> |
| chr2              | 25467048              | 25467265            | <i>DNMT3A</i> |
| chr2              | 25467391              | 25467609            | <i>DNMT3A</i> |
| chr2              | 25467956              | 25468169            | <i>DNMT3A</i> |
| chr2              | 25468813              | 25469023            | <i>DNMT3A</i> |
| chr2              | 25469068              | 25469275            | <i>DNMT3A</i> |
| chr2              | 25469564              | 25469721            | <i>DNMT3A</i> |
| chr2              | 25469954              | 25470165            | <i>DNMT3A</i> |
| chr2              | 25470459              | 25470643            | <i>DNMT3A</i> |
| chr2              | 198266775             | 198266977           | <i>SF3B1</i>  |
| chr2              | 198267156             | 198267375           | <i>SF3B1</i>  |
| chr2              | 209113028             | 209113167           | <i>IDH1</i>   |
| chr3              | 128202719             | 128202879           | <i>GATA2</i>  |
| chr4              | 55589610              | 55589817            | <i>KIT</i>    |
| chr4              | 55599238              | 55599448            | <i>KIT</i>    |
| chr4              | 106156648             | 106156852           | <i>TET2</i>   |
| chr4              | 106156901             | 106157106           | <i>TET2</i>   |
| chr4              | 106157797             | 106158005           | <i>TET2</i>   |
| chr4              | 106163905             | 106164104           | <i>TET2</i>   |
| chr4              | 106164760             | 106164969           | <i>TET2</i>   |
| chr4              | 106180648             | 106180819           | <i>TET2</i>   |
| chr4              | 106180868             | 106181034           | <i>TET2</i>   |
| chr4              | 106182820             | 106183023           | <i>TET2</i>   |
| chr4              | 106190723             | 106190931           | <i>TET2</i>   |
| chr4              | 106196200             | 106196404           | <i>TET2</i>   |
| chr4              | 106196456             | 106196672           | <i>TET2</i>   |
| chr4              | 106193871             | 106194071           | <i>TET2</i>   |

|       |           |           |               |
|-------|-----------|-----------|---------------|
| chr4  | 106196774 | 106196986 | <i>TET2</i>   |
| chr4  | 106197035 | 106197232 | <i>TET2</i>   |
| chr4  | 106197278 | 106197457 | <i>TET2</i>   |
| chr4  | 106197504 | 106197717 | <i>TET2</i>   |
| chr5  | 170837396 | 170837597 | <i>NPM1</i>   |
| chr6  | 40116164  | 40116368  | Control       |
| chr6  | 62094189  | 62094395  | Control       |
| chr7  | 140453031 | 140453234 | <i>BRAF</i>   |
| chr7  | 148504659 | 148504873 | <i>EZH2</i>   |
| chr7  | 148506344 | 148506546 | <i>EZH2</i>   |
| chr7  | 148508719 | 148508905 | <i>EZH2</i>   |
| chr8  | 117864136 | 117864320 | <i>RAD21</i>  |
| chr9  | 5073573   | 5073780   | <i>JAK2</i>   |
| chr10 | 5554195   | 5554404   | Control       |
| chr10 | 77210082  | 77210276  | Control       |
| chr10 | 106721508 | 106721713 | Control       |
| chr11 | 32413414  | 32413629  | <i>WT1</i>    |
| chr11 | 32414202  | 32414410  | <i>WT1</i>    |
| chr11 | 32417789  | 32417997  | <i>WT1</i>    |
| chr11 | 108175403 | 108175608 | <i>ATM</i>    |
| chr11 | 108183125 | 108183320 | <i>ATM</i>    |
| chr11 | 108236092 | 108236299 | <i>ATM</i>    |
| chr11 | 119148406 | 119148614 | <i>CBL</i>    |
| chr11 | 119148809 | 119149007 | <i>CBL</i>    |
| chr11 | 119149218 | 119149430 | <i>CBL</i>    |
| chr12 | 25380259  | 25380467  | <i>KRAS</i>   |
| chr12 | 25398178  | 25398390  | <i>KRAS</i>   |
| chr12 | 112888114 | 112888328 | <i>PTPN11</i> |
| chr12 | 112926848 | 112927052 | <i>PTPN11</i> |
| chr13 | 28592494  | 28592706  | <i>FLT3</i>   |
| chr13 | 28602179  | 28602380  | <i>FLT3</i>   |
| chr13 | 28608004  | 28608168  | <i>FLT3</i>   |
| chr13 | 28608218  | 28608392  | <i>FLT3</i>   |
| chr13 | 28609557  | 28609768  | <i>FLT3</i>   |
| chr14 | 56968905  | 56969108  | Control       |
| chr15 | 90631760  | 90631969  | <i>IDH2</i>   |
| chr16 | 8569723   | 8569894   | Control       |
| chr16 | 55770516  | 55770722  | Control       |
| chr17 | 7576969   | 7577174   | <i>TP53</i>   |

|       |           |           |               |
|-------|-----------|-----------|---------------|
| chr17 | 7577397   | 7577611   | <i>TP53</i>   |
| chr17 | 7578089   | 7578296   | <i>TP53</i>   |
| chr17 | 7578383   | 7578590   | <i>TP53</i>   |
| chr17 | 58740251  | 58740465  | <i>PPM1D</i>  |
| chr17 | 58740607  | 58740815  | <i>PPM1D</i>  |
| chr17 | 74732893  | 74733125  | <i>SRSF2</i>  |
| chr18 | 9750564   | 9750768   | Control       |
| chr18 | 42531783  | 42531986  | <i>SETBP1</i> |
| chr18 | 42533021  | 42533233  | <i>SETBP1</i> |
| chr19 | 13054545  | 13054710  | <i>CALR</i>   |
| chr20 | 31022219  | 31022401  | <i>ASXL1</i>  |
| chr20 | 31022525  | 31022701  | <i>ASXL1</i>  |
| chr20 | 31022898  | 31023107  | <i>ASXL1</i>  |
| chr21 | 36164939  | 36165160  | <i>RUNX1</i>  |
| chr21 | 36171482  | 36171697  | <i>RUNX1</i>  |
| chr21 | 36206703  | 36206893  | <i>RUNX1</i>  |
| chr21 | 36231609  | 36231827  | <i>RUNX1</i>  |
| chr21 | 36252808  | 36253008  | <i>RUNX1</i>  |
| chr21 | 44514699  | 44514914  | <i>U2AF1</i>  |
| chr21 | 44524280  | 44524488  | <i>U2AF1</i>  |
| chr22 | 29083873  | 29084069  | <i>CHEK2</i>  |
| chr22 | 29091685  | 29091879  | <i>CHEK2</i>  |
| chrX  | 123176348 | 123176514 | <i>STAG2</i>  |
| chrX  | 123178960 | 123179163 | <i>STAG2</i>  |
| chrX  | 123179209 | 123179368 | <i>STAG2</i>  |
| chrX  | 123181140 | 123181339 | <i>STAG2</i>  |
| chrX  | 123182799 | 123182999 | <i>STAG2</i>  |
| chrX  | 123197009 | 123197216 | <i>STAG2</i>  |
| chrX  | 123197553 | 123197752 | <i>STAG2</i>  |
| chrX  | 123197805 | 123198017 | <i>STAG2</i>  |
| chrX  | 123215282 | 123215439 | <i>STAG2</i>  |
| chrX  | 123217276 | 123217475 | <i>STAG2</i>  |
| chrX  | 123220442 | 123220651 | <i>STAG2</i>  |
| chrX  | 123181398 | 123181597 | <i>STAG2</i>  |
| chrX  | 133549087 | 133549301 | <i>PHF6</i>   |
| chrX  | 133551168 | 133551363 | <i>PHF6</i>   |
