# Supplementary material
Source: PubMed Central journal article supplement (PMC7677169)
Supplement: NIHMS1619744-supplement-3.pdf [file NIHMS1619744-supplement-3.pdf]

**Supplementary Table 2. Sample characteristics from clinical cohort.** Diagnosis, disease status, and age are denoted at time of sample collection. Cells, reads per cell, valid reads, and percent of reads in cells extracted from Tapestry's analytical pipeline on BlueBee. All samples selected are normal karyotype with the exception of four complex karyotype samples (denoted with asterisk). Serial samples from the same patient are listed subsequently in the table and denoted with carrot.

| Sample | Diagnosis   | Disease Status     | Age at sample collection (years) | Cells | Reads per cell | Valid reads | Percent of reads in cells |
|--------|-------------|--------------------|----------------------------------|-------|----------------|-------------|---------------------------|
| MSK1   | AML         | Relapse/Refractory | 76.3                             | 270   | 156141         | 1.4E+08     | 85.25                     |
| MSK2^  | AML         | Relapse/Refractory | 76.3                             | 217   | 164536         | 8.1E+07     | 63.9                      |
| MSK3   | AML         | Refractory         | 69.68                            | 1352  | 65374.5        | 9E+07       | 76.51                     |
| MSK4   |             | CH                 | 47.2                             | 9074  | 7042.5         | 6.4E+07     | 69.83                     |
| MSK5   | sAML (MPN)  | Newly Transformed  | 72.75                            | 6433  | 18238.3        | 6.2E+07     | 79.03                     |
| MSK6   | tAML        | Newly Diagnosed    | 40.09                            | 2273  | 20220          | 9.5E+07     | 86.96                     |
| MSK7   | AML         | MRD NEG CR         | 76.87                            | 369   | 164931         | 7.2E+07     | 45.6                      |
| MSK8   | AML         | Relapsed           | 70.17                            | 11337 | 5194.66        | 3.2E+07     | 53.34                     |
| MSK9   | AML         | Refractory         | 79.73                            | 6904  | 15935.8        | 7.9E+07     | 85.52                     |
| MSK10  | PMF         | Persistent         | 74.47                            | 1977  | 38781.4        | 2E+07       | 28.94                     |
| MSK11  |             | CH                 | 73.8                             | 14937 | 6624.4         | 9.9E+07     | 55.45                     |
| MSK12  | ET          | Chronic Stage      | 53.04                            | 2281  | 23374.8        | 1.1E+08     | 69.98                     |
| MSK13^ | MF          | Chronic Stage      | 54.81                            | 2813  | 77030          | 6.9E+07     | 67.49                     |
| MSK14^ | sAML (MF)   | Blastic Phase      | 55.73                            | 3260  | 34475          | 1.2E+08     | 84.81                     |
| MSK15  |             | CH                 | 67.6                             | 13125 | 8031.2         | 1.1E+08     | 66.94                     |
| MSK16  | sAML (CMML) | Newly Transformed  | 82.15                            | 1334  | 53950.1        | 6.3E+07     | 76.58                     |
| MSK17  | sAML        | Newly Transformed  | 59.18                            | 19237 | 4911.5         | 4E+07       | 66.83                     |
| MSK18  |             | CH                 | 69.7                             | 22317 | 17881.8        | 4E+08       | 50.49                     |
| MSK19  |             | CH                 | 77.61                            | 6813  | 10308          | 1.7E+08     | 62.26                     |
| MSK20  | PV          | Chronic Stage      | 72.53                            | 5119  | 20537.7        | 1.7E+08     | 69                        |
| MSK21^ | sAML        | Blastic Phase      | 75.37                            | 1513  | 25514          | 1.7E+08     | 87.15                     |
| MSK22^ | Post-PV MF  | Chronic Stage      | 74.73                            | 8475  | 4132.11        | 4.2E+07     | 47.63                     |
| MSK23  |             | CH                 | 81.32                            | 9909  | 7210.24        | 1.6E+08     | 70.41                     |
| MSK24  | tAML        | MRD+ CR            | 53.5                             | 11296 | 8677.8         | 9.8E+07     | 70                        |
| MSK25^ | tAML        | Relapsed           | 53.6                             | 3167  | 22732.5        | 7.2E+07     | 64.66                     |
| MSK26  | MPN-NOS     | Chronic Stage      | 77.79                            | 7861  | 8386.39        | 5.8E+07     | 86.1                      |

|        |                 |                    |       |       |         |         |       |
|--------|-----------------|--------------------|-------|-------|---------|---------|-------|
| MSK27^ | MF              | Accelerated Stage  | 82.78 | 4806  | 20481.7 | 1.3E+08 | 86.01 |
| MSK28  | AML             | Relapsed           | 58.19 | 15120 | 4175.57 | 8.5E+07 | 76.75 |
| MSK29  |                 | CH                 | 64.18 | 326   | 97263.1 | 2.8E+07 | 66.66 |
| MSK30  |                 | CH                 | 69.9  | 13164 | 6982.3  | 9.2E+07 | 68.92 |
| MSK31  |                 | CH                 | 64.4  | 10743 | 5391.12 | 1.3E+08 | 81.87 |
| MSK32  | AML             | Refractory         | 74.78 | 669   | 94734.2 | 1.1E+08 | 87.55 |
| MSK33  |                 | CH                 | 84.79 | 1027  | 82183.6 | 8.4E+07 | 55.99 |
| MSK34  | AML             | Newly Diagnosed    | 77.68 | 11087 | 7670    | 1.4E+08 | 88.52 |
| MSK35  | AML             | Refractory         | 42.9  | 1157  | 41713.9 | 4E+07   | 60.93 |
| MSK36  | AML             | Relapse/Refractory | 67.32 | 10324 | 30926.8 | 3.6E+07 | 40.83 |
| MSK37  | CMML w/MF       | Persistent         | 59.77 | 2693  | 32642.5 | 8.8E+07 | 80.58 |
| MSK38  | AML             | Relapse            | 48.32 | 3198  | 15301.3 | 287649  | 28.96 |
| MSK39  | MF              | Chronic Stage      | 53.46 | 3826  | 14082   | 7.3E+08 | 82.39 |
| MSK40  | sAML            | Newly Transformed  | 56.8  | 7201  | 5331.2  | 5.4E+07 | 71.13 |
| MSK41  | AML             | Newly Diagnosed    | 55.52 | 1367  | 46036.7 | 6E+07   | 83.3  |
| MSK42  | AML             | Relapse/Refractory | 50.1  | 2819  | 33317.9 | 5.1E+07 | 69    |
| MSK43  | MF              | Chronic Stage      | 72.98 | 6044  | 10955.7 | 5.7E+07 | 62.85 |
| MSK44^ | sAML            | Refractory         | 76.65 | 10063 | 4880.19 | 8.4E+07 | 68.02 |
| MSK45  | AML             | Refractory         | 81.53 | 1089  | 35118.9 | 6.2E+07 | 76.07 |
| MSK46  | AML             | Persistent (7% BM) | 81.62 | 728   | 86986.7 | 4.9E+07 | 67.47 |
| MSK47  | AML             | Relapsed           | 74.89 | 1610  | 58845.2 | 1.2E+08 | 78.55 |
| MSK48  |                 | CH                 | 64.13 | 2794  | 34013   | 9.5E+07 | 84.29 |
| MSK49  | sAML (Prior PV) | Relapse/Refractory | 68.8  | 9366  | 8919.88 | 3.9E+08 | 80.87 |
| MSK50  | AML             | Relapsed           | 65.16 | 14531 | 3120.03 | 4.9E+07 | 72.09 |
| MSK51  | sAML (Prev PV)  | Relapsed           | 63.95 | 981   | 102507  | 9.1E+07 | 70.36 |
| MSK52  | AML             | Refractory         | 68    | 3212  | 25891.5 | 8.7E+07 | 83.6  |
| MSK53  | sAML (Prev MDS) | Relapsed           | 78.99 | 848   | 46319.4 | 3.9E+07 | 77.14 |
| MSK54^ | sAML (Prev MDS) | Relapsed           | 78.99 | 2078  | 66166.2 | 6.2E+07 | 76.67 |
| MSK55  | AML             | Relapse/Refractory | 71.53 | 335   | 218026  | 4.1E+08 | 14.62 |
| MSK56  | MF              | Chronic Stage      | 72.97 | 933   | 166876  | 7.8E+07 | 59.17 |
| MSK57^ | AML             | Refractory         | 74.75 | 8465  | 3659.69 | 3.1E+07 | 75.01 |
| MSK58  |                 | CH                 | 75.35 | 11735 | 10098.7 | 9.9E+07 | 77.95 |
| MSK59  | MF              | Chronic Stage      | 68.71 | 1242  | 68903.9 | 6.4E+07 | 56.06 |
| MSK60  | MF              | Chronic Stage      | 61.98 | 2419  | 50010.8 | 7.5E+07 | 82.24 |

|        |            |                            |       |       |         |         |       |
|--------|------------|----------------------------|-------|-------|---------|---------|-------|
| MSK61^ | MF         | Accelerated Stage          | 62.24 | 396   | 176986  | 6.7E+07 | 80.44 |
| MSK62^ | sAML       | Newly Transformed          | 62.56 | 490   | 148847  | 3.8E+07 | 83.85 |
| MSK63  | AML        | Relapse/Refractory         | 53.01 | 1411  | 44068.1 | 2.9E+07 | 74.07 |
| MSK64  | AML        | Early Relapse post SCT     | 64.4  | 1252  | 44208.2 | 7.2E+07 | 68.1  |
| MSK65  | tAML       | Newly Diagnosed            | 64.44 | 7134  | 10485.4 | 8.4E+07 | 83.09 |
| MSK66* | AML        | Refractory                 | 67.95 | 7814  | 10757.4 | 8.8E+07 | 71.6  |
| MSK67  | AML        | Refractory                 | 72.72 | 15889 | 22898.1 | 7.3E+07 | 81.38 |
| MSK68  |            | CH                         | 82.2  | 8243  | 7066.74 | 3.4E+07 | 68.41 |
| MSK69  | AML        | Refractory                 | 75.24 | 7173  | 15460.1 | 9.8E+07 | 85.05 |
| MSK70^ | AML        | Refractory                 | 75.47 | 856   | 80739.8 | 5.5E+07 | 76.18 |
| MSK71^ | AML        | Refractory                 | 75.55 | 12878 | 3027.41 | 7.7E+07 | 72.41 |
| MSK72  | sAML       | Refractory                 | 57.24 | 3195  | 42404   | 4.6E+07 | 26.17 |
| MSK73  | AML        | Refractory                 | 61.52 | 1302  | 64170.5 | 5.4E+07 | 74.01 |
| MSK74  |            | CH                         | 62.1  | 2098  | 13857.8 | 2.9E+07 | 15.44 |
| MSK75  | Post-ET MF | Chronic Stage              | 64.61 | 4240  | 14061   | 7.6E+07 | 79.95 |
| MSK76^ | sAML       | Newly Transformed          | 65.33 | 7033  | 13495.7 | 1.6E+08 | 57.56 |
| MSK77* | AML        | Refractory                 | 70.96 | 9555  | 6371.68 | 3.3E+07 | 77.99 |
| MSK78  | AML        | Relapsed                   | 64.75 | 1830  | 48950.3 | 1E+08   | 76.23 |
| MSK79  | AML        | Refractory                 | 54.48 | 1709  | 78365.9 | 1.3E+08 | 72.31 |
| MSK80^ | AML        | Refractory                 | 54.48 | 1659  | 23813.9 | 9.5E+07 | 77.55 |
| MSK81  | AML        | Relapsed                   | 69.81 | 517   | 146075  | 5.8E+07 | 75.19 |
| MSK82^ | AML        | MRD NEG CR                 | 69.2  | 3833  | 15700.9 | 6E+07   | 76.32 |
| MSK83^ | AML        | Persistent (7% PB)         | 70.2  | 10839 | 8849    | 9.6E+07 | 75.11 |
| MSK84  | AML        | Newly Diagnosed            | 76.71 | 409   | 148324  | 3.9E+07 | 73.67 |
| MSK85  | sAML       | Newly Transformed          | 79.85 | 391   | 52386.4 | 4.3E+07 | 53.5  |
| MSK86  | AML        | Persistent Disease (7% BM) | 78.26 | 12298 | 5998.35 | 9.3E+07 | 84.93 |
| MSK87  | AML        | Relapsed                   | 71.19 | 79    | 3641.13 | 6.3E+07 | 74.31 |
| MSK88  | sAML (MDS) | Newly Transformed          | 55.99 | 1805  | 41600.1 | 7.6E+07 | 72.04 |
| MSK89  | tAML       | Newly Diagnosed            | 5.75  | 1069  | 67006.5 | 5.3E+07 | 80.8  |
| MSK90  | AML        | Refractory                 | 64.45 | 12188 | 6473.65 | 1E+08   | 79.94 |
| MSK91  | AML        | Refractory                 | 83.39 | 13052 | 3940.41 | 4.5E+07 | 65.98 |
| MSK92  | AML        | Newly Diagnosed            | 24.3  | 1390  | 35513.1 | 1.1E+08 | 78.33 |

|         |         |                    |       |       |         |         |       |
|---------|---------|--------------------|-------|-------|---------|---------|-------|
| MSK93   | AML     | Newly Diagnosed    | 44.85 | 1113  | 25637.7 | 8.6E+07 | 65.46 |
| MSK94   | AML     | Newly Diagnosed    | 66.29 | 910   | 27045.5 | 3.5E+07 | 65.89 |
| MSK95   | AML     | Refractory         | 66.1  | 5179  | 16123.1 | 1.2E+08 | 80.95 |
| MSK96^  | sAML    | Newly Transformed  | 65.7  | 14433 | 26014.2 | 3.8E+08 | 84.38 |
| MSK97   | AML     | Refractory         | 81.73 | 1325  | 38813.6 | 5E+07   | 65.24 |
| MSK98*  | AML     | Relapsed           | 70.93 | 11954 | 5665.72 | 7.1E+07 | 69.01 |
| MSK99   | AML     | Refractory         | 68.97 | 5020  | 14391.9 | 4.1E+07 | 70.98 |
| MSK100  | AML     | Refractory         | 69.17 | 8,580 | 69770.4 | 7.9E+07 | 74.34 |
| MSK101  | AML     | Relapsed           | 61.64 | 331   | 236867  | 5.8E+07 | 68.72 |
| MSK102^ | AML     | Relapse/Refractory | 61.78 | 1277  | 132340  | 6.3E+07 | 79.9  |
| MSK103^ | AML     | Relapse/Refractory | 62.02 | 12680 | 6365.25 | 3.5E+08 | 21.46 |
| MSK104  | AML     | MRD+ CR            | 63.3  | 9070  | 10754.5 | 7.7E+07 | 84.39 |
| MSK105* | sAML    | Newly Transformed  | 76.55 | 8943  | 10549.3 | 3.1E+07 | 75.01 |
| MSK106  | AML     | Newly Diagnosed    | 71.7  | 3752  | 20588.8 | 4.9E+07 | 36.23 |
| MSK107  | AML     | Relapse/Refractory | 62.75 | 8367  | 13369.9 | 3.9E+07 | 74.78 |
| MSK108^ | AML     | Persistent         | 62.85 | 220   | 310240  | 3.8E+07 | 60.4  |
| MSK109  | AML     | Relapsed           | 59.39 | 6996  | 13984.3 | 7E+07   | 66.08 |
| MSK110  | AML     | Relapsed           | 76.8  | 326   | 232188  | 4.7E+07 | 53.93 |
| MSK111  |         | CH                 | 72.5  | 10168 | 5087.4  | 5.2E+07 | 59.15 |
| MSK112  | AML     | Relapse            | 72.8  | 12976 | 4800.67 | 5.1E+07 | 61.85 |
| MSK113  | AML     | Relapsed           | 86.96 | 8791  | 8121.92 | 7.1E+07 | 69.4  |
| MSK114  | AML     | MRD NEG CR         | 45.39 | 189   | 245914  | 4.6E+07 | 76.26 |
| MSK115  | AML     | Newly Diagnosed    | 59.37 | 616   | 93339.2 | 1.1E+08 | 68.54 |
| MSK116  | MDS     | Persistent         | 60.11 | 252   | 223229  | 7.3E+07 | 65.32 |
| MSK117  | AML     | Persistent         | 58.09 | 282   | 145254  | 6.1E+07 | 59.06 |
| MSK118  | MDS-MLD | Persistent         | 71.46 | 5848  | 15901.8 | 7.6E+07 | 72.55 |
| MSK119  | AML     | Relapse            | 76.94 | 441   | 112395  | 5.6E+07 | 64.53 |
| MSK120  | AML     | Refractory         | 68.52 | 321   | 194304  | 9.8E+07 | 81.09 |
| MSK121  | AML     | Newly Diagnosed    | 75.79 | 6406  | 11796.1 | 7E+07   | 78.8  |
| MSK122  |         | CH                 | 53.27 | 1268  | 37413.8 | 1.7E+08 | 83    |
| MSK123  | AML     | Relapsed           | 71.84 | 990   | 54714.6 | 8.1E+07 | 80.89 |
| MSK124  |         | CH                 | 73.93 | 12623 | 6448.22 | 6.2E+07 | 74.11 |
| MSK125  | CMML    | Persistent         | 76.23 | 7114  | 8724.71 | 4.8E+07 | 66.32 |
| MSK126  | AML     | Refractory         | 66.64 | 10354 | 8497.08 | 8.3E+07 | 73.21 |
| MSK127  | AML     | Relapse/Refractory | 37.68 | 1480  | 22450.5 | 9.4E+07 | 65.78 |
| MSK128^ | AML     | Relapse/Refractory | 37.68 | 7210  | 10323.4 | 7.4E+07 | 87.3  |

|            |                           |                             |       |       |         |         |       |
|------------|---------------------------|-----------------------------|-------|-------|---------|---------|-------|
| MSK129     | AML                       | Newly Diagnosed             | 20.61 | 3518  | 18155.1 | 2.2E+08 | 84.46 |
| MSK130^    | AML                       | Newly Diagnosed             | 20.61 | 4363  | 22553.1 | 9.8E+07 | 57.87 |
| MSK131     | sAML<br>(CMML to<br>AMML) | Newly<br>Transformed        | 69.95 | 657   | 27581.1 | 5.9E+07 | 68.54 |
| MSK132     | Post-ET MF                | Persistent                  | 78.4  | 4586  | 12703.6 | 7.1E+07 | 79.39 |
| MSK133     |                           | CH                          | 79.74 | 9852  | 7204    | 7.4E+07 | 72.44 |
| MSK134     | AML                       | Primary Refractory          | 33.95 | 4492  | 13410.9 | 1.8E+07 | 69.36 |
| MSK135^    | AML                       | Relapsed                    | 33.9  | 12973 | 5225.7  | 6.8E+07 | 73.8  |
| MSK136^    | AML                       | Persistent AML<br>(~20% BM) | 35.1  | 2430  | 18828.1 | 4.6E+07 | 60.62 |
| MSK137     | AML                       | Refractory                  | 77.6  | 9259  | 9370.12 | 9.4E+07 | 74.21 |
| MSK138     | sAML<br>(CMML to<br>AMML) | Newly<br>Transformed        | 50.37 | 835   | 51223.3 | 6E+07   | 80.69 |
| MSK139^    | sAML<br>(CMML to<br>AMML) | Newly<br>Transformed        | 50.37 | 2598  | 63597.6 | 1.7E+08 | 85.71 |
| MSK140^    | sAML                      | Newly<br>Transformed        | 50.3  | 8332  | 7331.6  | 6.1E+07 | 69.56 |
| MSK141^    | sAML                      | Relapsed post SCT           | 50.8  | 8892  | 6972.1  | 6.2E+07 | 68.99 |
| MSK142     |                           | CH                          | 73.06 | 8990  | 9548.03 | 1.1E+08 | 81.35 |
| MSK143     |                           | CH                          | 73.82 | 7482  | 13562.8 | 8.1E+07 | 87.55 |
| MSK144     | AML                       | Newly Diagnosed             | 65.03 | 4693  | 16865.2 | 1.2E+08 | 80.24 |
| MSK145     | AML                       | Newly Diagnosed             | 70.84 | 7490  | 13255   | 6.6E+07 | 80.01 |
| MSK146     | AML                       | Newly Diagnosed             | 32.84 | 970   | 41029.5 | 7.3E+07 | 64.24 |
| MSK147     | AML                       | Newly Diagnosed             | 72.24 | 2527  | 28720.1 | 6.6E+07 | 77.46 |
| MSK148     |                           | CH                          | 79.9  | 11379 | 7964.88 | 6.9E+07 | 74.62 |
| TJU17-003  | AML                       | Newly Diagnosed             | 67    | 13092 | 6216.16 | 9.8E+07 | 85.39 |
| TJU17-005  | AML                       | Newly Diagnosed             | 66    | 8995  | 7637.22 | 8.4E+07 | 85.23 |
| TJU17-006  | AML                       | Newly Diagnosed             | 69    | 922   | 180336  | 6.1E+07 | 84.34 |
| TJU17-020  | AML                       | Newly Diagnosed             | 76    | 5887  | 26711.3 | 6.8E+07 | 80.31 |
| TJU17-021^ | AML                       | Newly Diagnosed             | 76    | 976   | 34475.9 | 9.4E+07 | 84.12 |
| TJU18-003  | AML                       | Newly Diagnosed             | 64    | 3918  | 7198.06 | 8.4E+07 | 86.3  |
| UP3326     | AML                       | Newly Diagnosed             | 71.1  | 1385  | 53475.2 | 1.1E+08 | 82.99 |
| UP4410     | AML                       | Relapsed                    | 66.3  | 10766 | 12157.2 | 8.6E+07 | 77.85 |
| UP5046     | AML                       | Relapsed                    | 70.6  | 10070 | 17158.9 | 2.5E+07 | 23.48 |
| UP5346     | AML                       | Newly Diagnosed             | 75.2  | 6651  | 16083.5 | 6.8E+07 | 59.56 |
| UP5480     | AML                       | Newly Diagnosed             | 68.4  | 10451 | 16149.9 | 7.2E+07 | 65.76 |
| UP5522     | tAML                      | Relapsed                    | 74.9  | 7202  | 16460.1 | 5.8E+08 | 62.74 |
| UP5941     | AML                       | Newly Diagnosed             | 70.3  | 8426  | 7953.98 | 6.3E+07 | 66.68 |

|        |     |          |      |      |         |         |       |
|--------|-----|----------|------|------|---------|---------|-------|
| UP6225 | AML | Relapsed | 68.1 | 6477 | 20632.8 | 7.4E+07 | 81.54 |
|--------|-----|----------|------|------|---------|---------|-------|
